# Supplementary material for: Increased Power To Dissect Adaptive Traits in Global Sorghum Diversity Using a Nested Association Mapping Population
Source: Oxford University Press journal article supplement (doi:10.1534/genetics.116.198499), 2017-06-01
Supplement: combinedsi.pdf [file combinedsi.pdf]

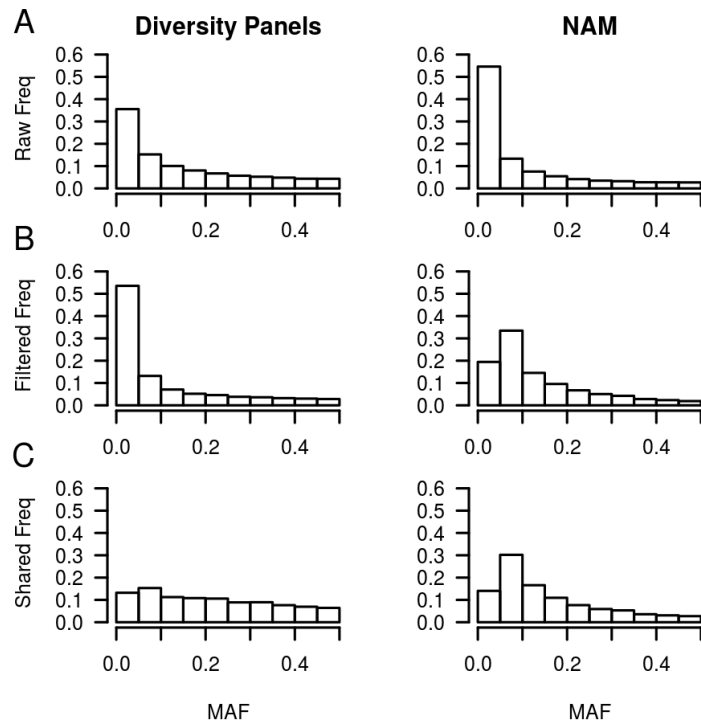

**Figure S1: Minor allele frequencies (MAF) of genotyping-by-sequencing markers.** (A) In raw data before filtering for missing rate and data imputation (300K SNP). (B) After filtering for missing rate and data imputation (200K SNP for the diversity panel, 90K SNP for the NAM). (C) Using 60K common high-quality shared markers between NAM and diversity panels.

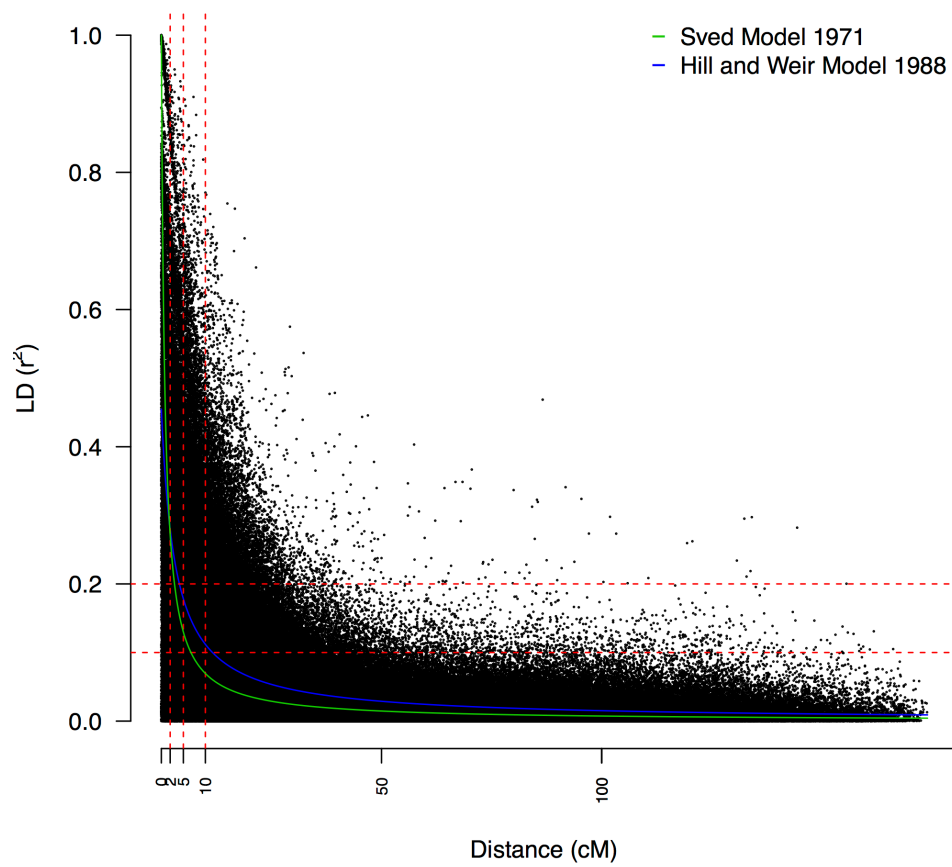

**Figure S2: Linkage disequilibrium extent in the NAM population.** LD ( $r^2$ ) was calculated with 8349 unique loci. LD extent was modeled using non-linear model described in Sved (1971) and Hill and Weir (1988).

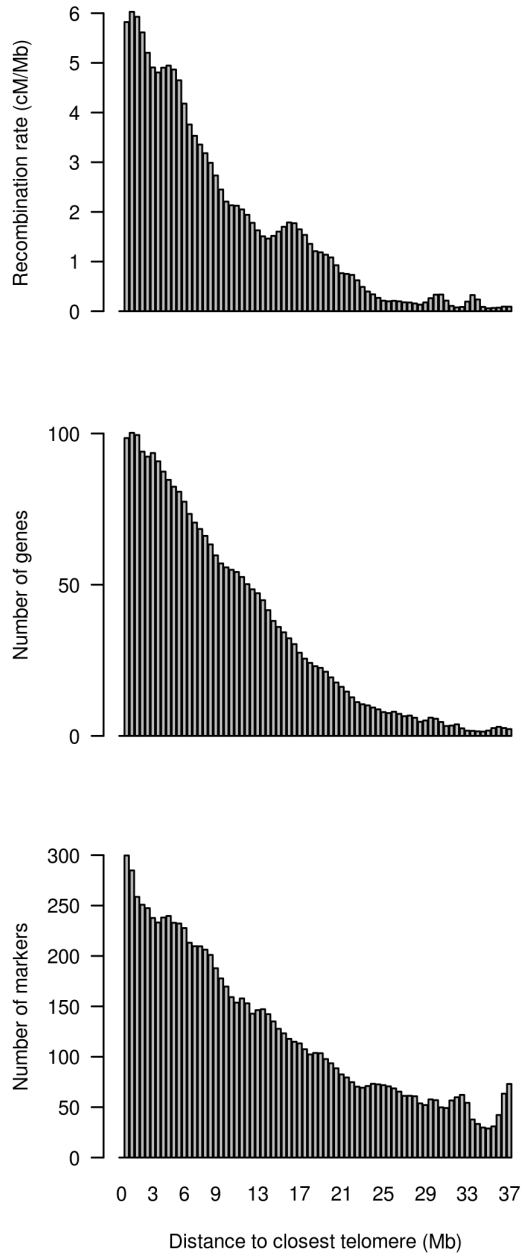

**Figure S3: Recombination rates, gene and marker density versus distance from telomeres.**

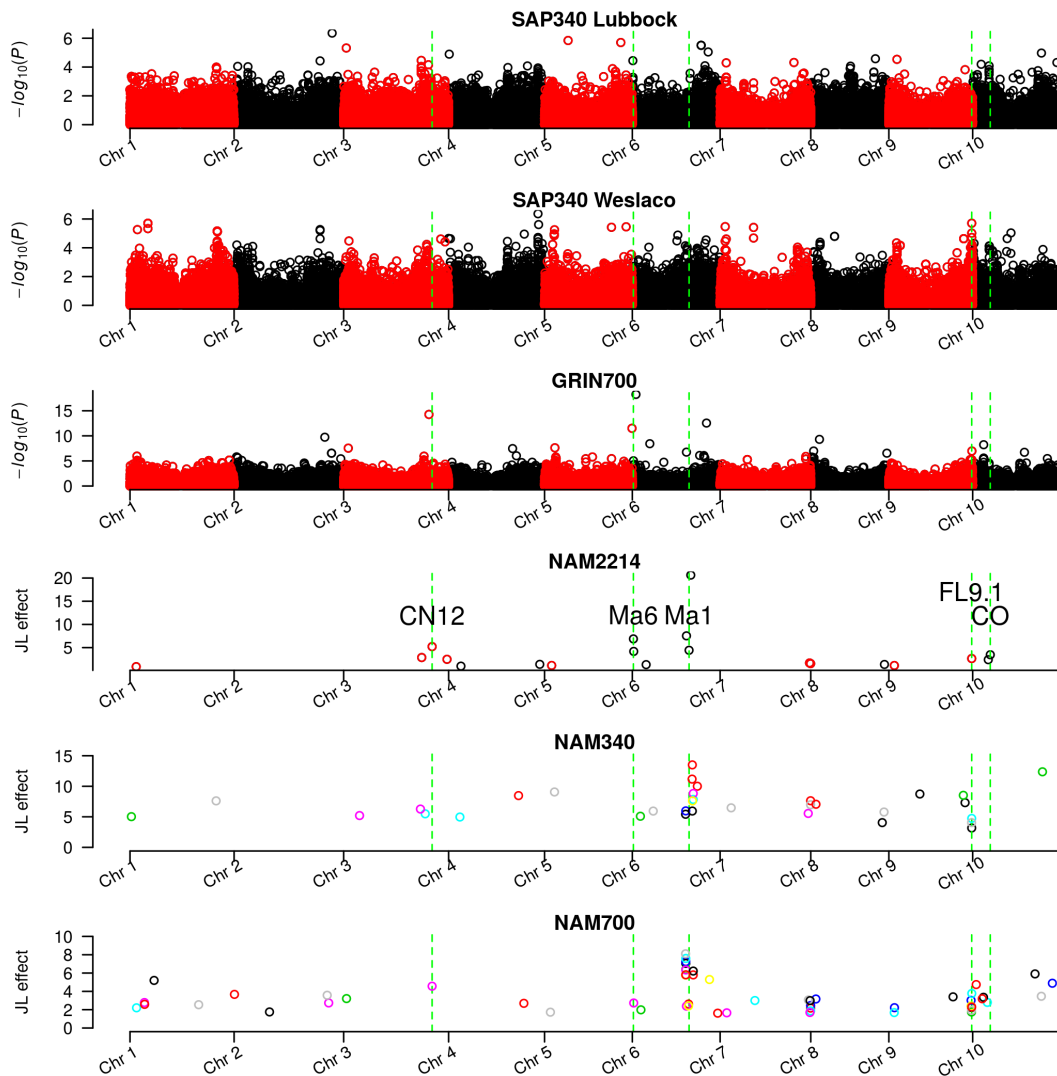

**Figure S4: QTL mapping for flowering time using the diversity panels (with multi-locus mixed-models) and NAM (with joint linkage).** SAP340 is a diversity panel of 340 lines, evaluated in Lubbock and Weslaco, USA. GRIN700 is a diversity panel of 700 lines evaluated in Lubbock. NAM2214 is the NAM population of 2214 RIL. NAM340 and NAM700 indicate subsets of the NAM population, including equal number of lines from each 10 families. Different colors represent results for different samples.

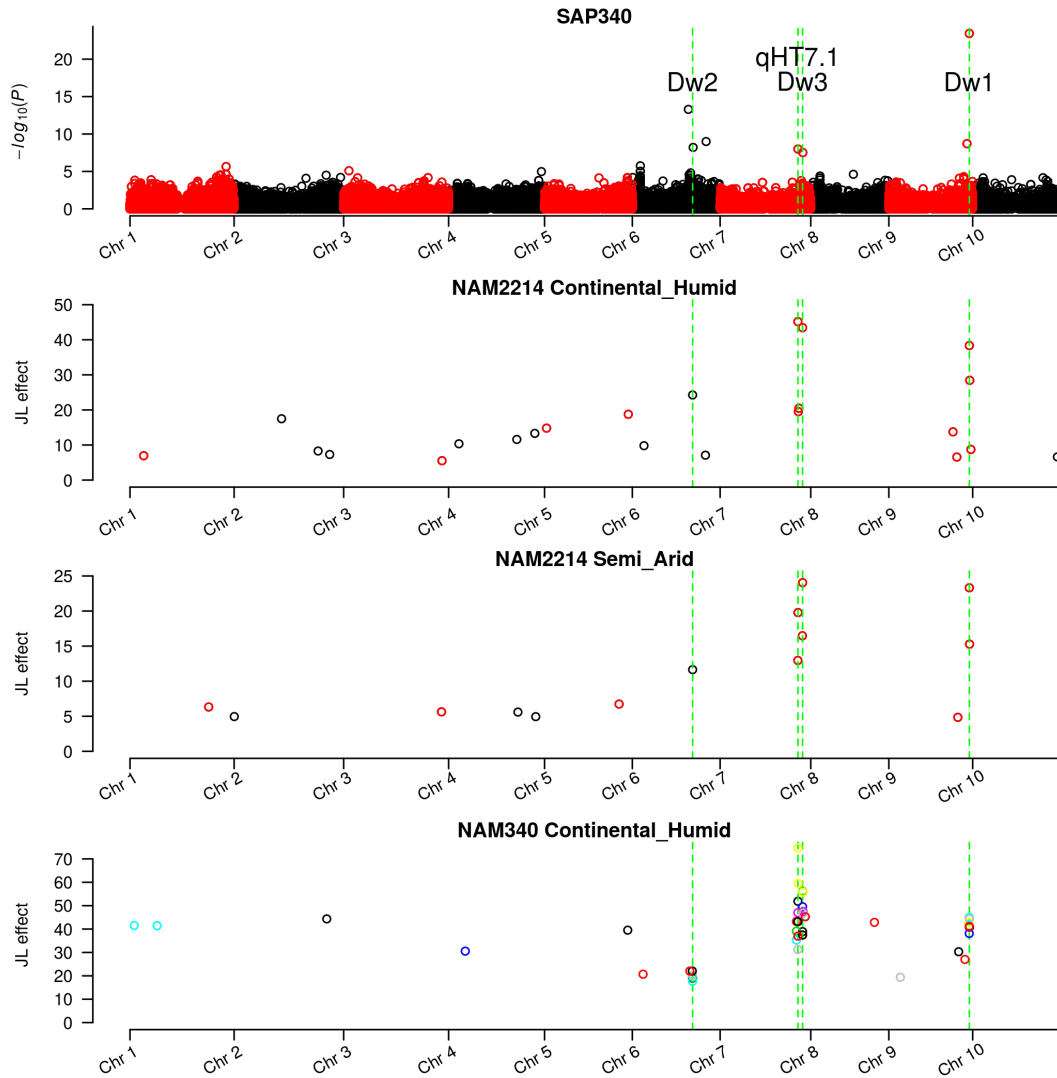

**Figure S5: QTL mapping for plant height using the diversity panels (with multi-locus mixed-models) and NAM (with joint linkage).** SAP340 is a diversity panel of 340 lines, evaluated in Lubbock and Weslaco, USA. GRIN700 is a diversity panel of 700 lines evaluated in Lubbock. NAM2214 is the NAM population of 2214 RIL. NAM340 and NAM700 indicate subsets of the NAM population, including equal number of lines from each 10 families. Different colors represent results for different samples.

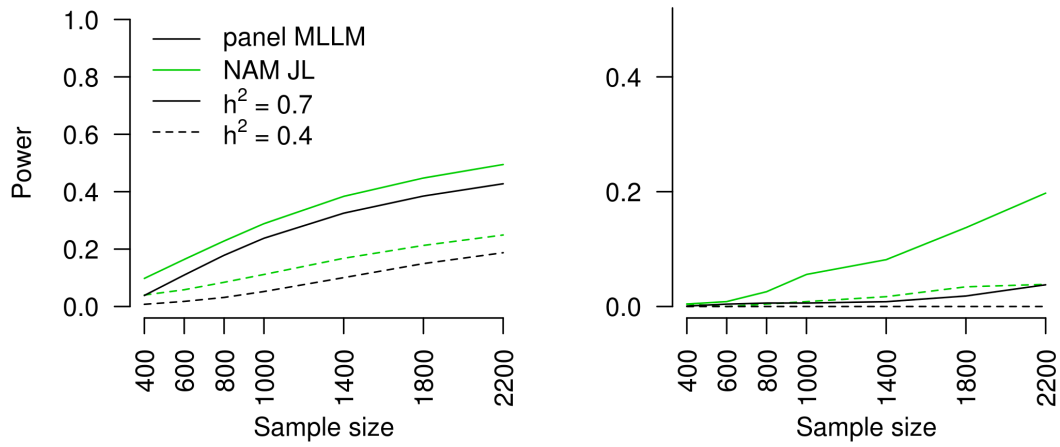

**Figure S6: Power of QTL detection on chromosome 6 when under selection (A) or across the whole genome (B).**

**Table S1: Joint linkage QTL for flowering time and plant height**

| Trait <sup>1</sup> | SNP <sup>2</sup> | Effect <sup>2</sup> | Known gene (or locus) | Distance to gene (locus) |
|--------------------|------------------|---------------------|-----------------------|--------------------------|
| Height CH/SA       | S7_55156401      | 45.19               | (qHT7.1)              | (Colocalized)            |
| Height CH/SA       | S7_58487616      | 43.45               | Dw3                   | 70                       |
| Height CH/SA       | S9_57069231      | 38.36               | Dw1                   | 28                       |
| Height CH/SA       | S6_42726152      | 24.27               | (Dw2)                 | (Colocalized)            |
| Height CH          | S5_59380917      | 18.76               |                       |                          |
| Height CH          | S2_33698052      | 17.49               |                       |                          |
| Height CH          | S5_1450001       | 14.81               |                       |                          |
| Height CH          | S9_45490823      | 13.75               |                       |                          |
| Height CH          | S4_61088979      | 13.31               |                       |                          |
| Height CH          | S4_48330648      | 11.59               |                       |                          |
| Height CH          | S4_7314013       | 10.35               |                       |                          |
| Height CH          | S6_8245968       | 9.80                |                       |                          |
| Height CH          | S2_59585117      | 8.30                |                       |                          |
| Height CH          | S2_67813119      | 7.30                |                       |                          |
| Height CH          | S6_51809222      | 7.10                |                       |                          |
| Height CH          | S1_9723354       | 6.95                |                       |                          |
| Height SA          | S5_52851428      | 6.74                |                       |                          |
| Height CH          | S10_60070002     | 6.62                |                       |                          |
| Height CH/SA       | S9_48220391      | 6.57                |                       |                          |
| Height SA          | S1_55760105      | 6.33                |                       |                          |
| Height SA          | S4_49121762      | 5.60                |                       |                          |
| Height CH/SA       | S3_69728543      | 5.53                |                       |                          |
| Height SA          | S2_184254        | 4.96                |                       |                          |
| Flowering time     | S6_41417540      | 20.64               |                       |                          |
|                    | S6_38361618      | 7.54                |                       |                          |
|                    | S6_758162        | 6.88                | Ma6                   | 84                       |
|                    | S3_62707083      | 5.22                | SbCN12                | 64                       |
|                    | S6_40204294      | 4.43                | Ma1                   | 63                       |
|                    | S10_12485175     | 3.47                | SbCO                  | 199                      |
|                    | S3_55337873      | 2.87                |                       |                          |
|                    | S9_58743830      | 2.65                | (SbFL9.1)             | (Colocalized)            |
|                    | S3_73262074      | 2.48                |                       |                          |
|                    | S7_63424491      | 1.67                |                       |                          |
|                    | S7_64151910      | 1.55                |                       |                          |
|                    | S4_64611885      | 1.40                |                       |                          |
|                    | S8_52244337      | 1.37                |                       |                          |
|                    | S6_9786706       | 1.33                |                       |                          |
|                    | S5_5055262       | 1.15                |                       |                          |
|                    | S9_3912094       | 1.14                |                       |                          |
|                    | S4_8739831       | 1.01                |                       |                          |
|                    | S1_4408231       | 0.89                |                       |                          |

<sup>1</sup> Height QTL in continental humid (CH) or semi-arid (SA) environments or both

<sup>2</sup> Top SNP and QTL effect using the Joint-linkage model in TASSEL. If the QTL was discovered in both environments the SNP and effect size is given from the CH environment
